# Supplementary material for: Study on the structural and electrocatalytic properties of Ba2+- and Eu3+-doped silica xerogels as sensory platforms
Source: Royal Society of Chemistry journal article supplement (doi:10.1039/c6ra22508j), 2016-01-01
Supplement: c6ra22508j1.pdf [file c6ra22508j1.pdf]

## Supplementary information

### Study on the structural and electrocatalysis properties of Ba<sup>2+</sup> and Eu<sup>3+</sup> doped silica-xerogels as a sensory platform

Paulo A. Raymundo-Pereira<sup>a,b,c</sup>, Diego A. Ceccato<sup>a,b</sup>, Airton G. B. Junior<sup>a,b</sup>, Marcos F.  
S. Teixeira<sup>a,b</sup>, Sergio A. M. Lima<sup>a,b</sup> and Ana. M. Pires<sup>a,b,\*</sup>

*<sup>a</sup> Department of Chemistry and Biochemistry, Faculty of Science and Technology, São  
Paulo State University (UNESP) Rua Roberto Simonsen, 305, 19060-900 Presidente  
Prudente, SP, Brazil*

*<sup>b</sup> Instituto de Biociências, Letras e Ciências Exatas, UNESP - Univ Estadual Paulista,  
Rua Cristóvão Colombo, 2265, 15054-000 São José do Rio Preto, SP, Brazil*

*<sup>c</sup> Instituto de Química de São Carlos, Universidade de São Paulo, São Carlos, São  
Paulo, CEP 13566-590, Brazil*

\*Ana Maria Pires

Address:

Faculdade de Ciências e Tecnologia, UNESP – Univ. Estadual Paulista, Rua Roberto  
Simonsen, 305, 19060-900 – Presidente Prudente/SP – Brazil

E-mail: [anapires@fct.unesp.br](mailto:anapires@fct.unesp.br)

Tel: +55 1832295748.

**Figure S1**

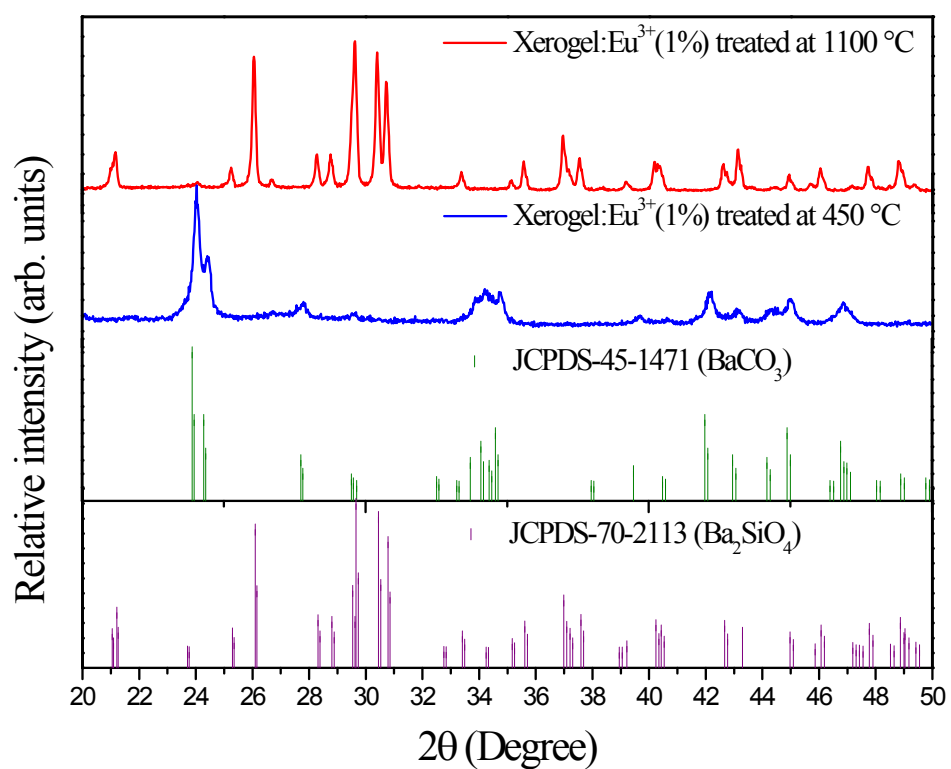

**Figure S1** – X-ray powder diffractograms of (a) Xerogel:Eu<sup>3+</sup>(1%) treated at 450 °C and (b) Xerogel:Eu<sup>3+</sup>(1%) treated at 1100 °C.

Figure S2

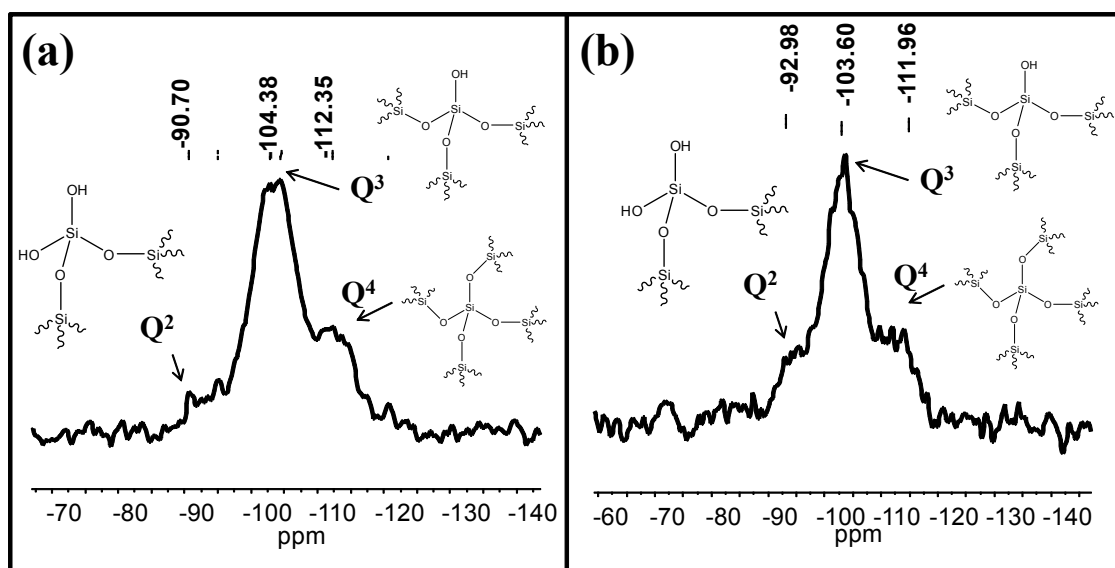

Figure S2 - Solid state  $^{29}\text{Si}$  NMR spectra of (a) silica xerogel: $\text{Ba}^{2+}$  and (b) silica xerogel: $\text{Ba}^{2+}, \text{Eu}^{3+}$  (1 ch%).

Figure S3

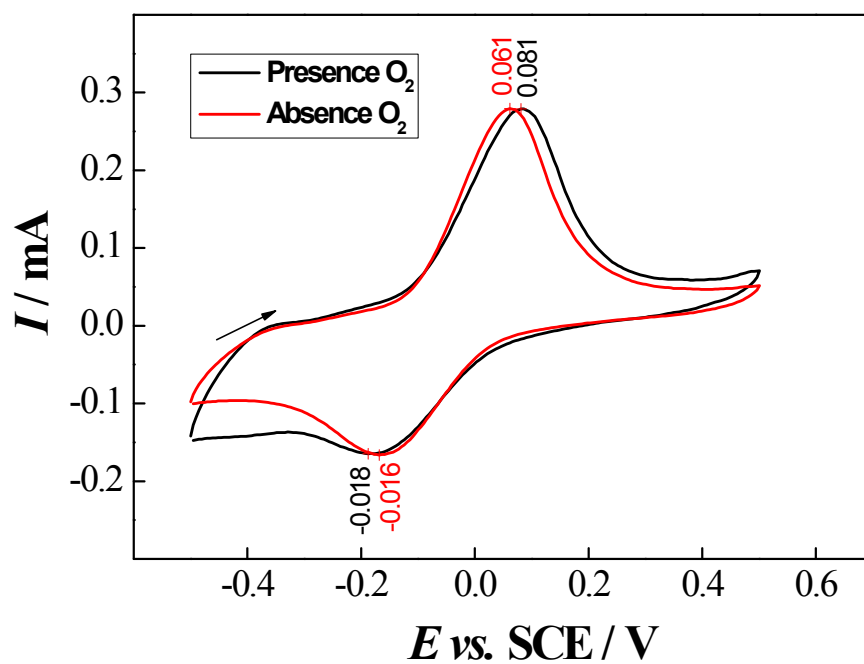

**Figure S3** – Voltammetric response of the modified carbon paste electrode with xerogel:Eu<sup>3+</sup>(1 ch%) in 0.5 mol L<sup>-1</sup> KCl solution in the absence (red line) and in the presence (black line) of dissolved oxygen. Scan rate of 50 mV s<sup>-1</sup>.

Figure S4

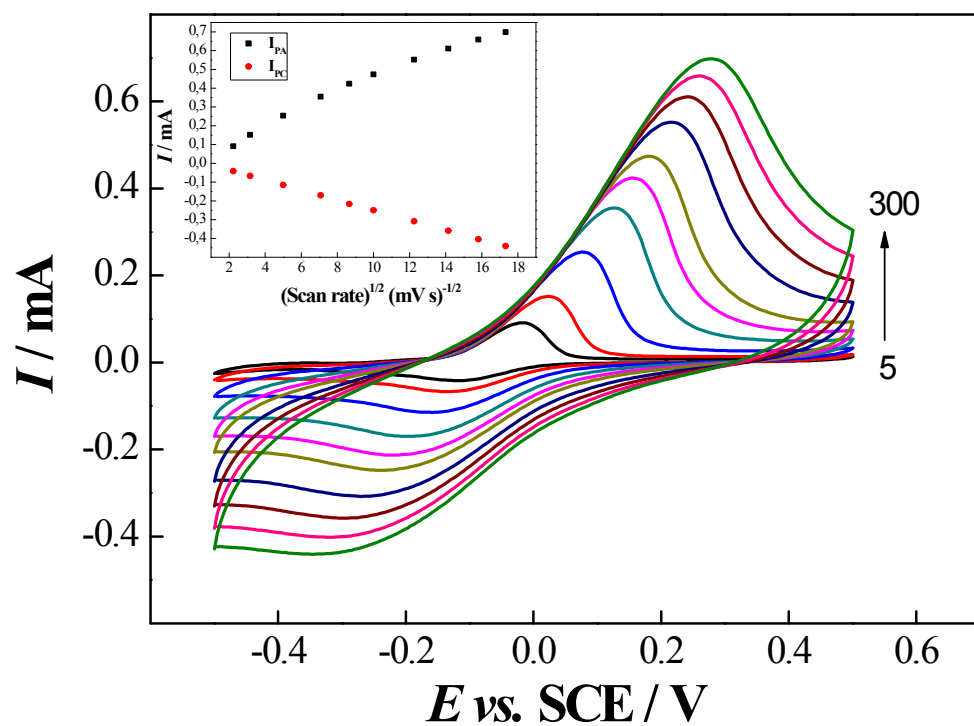

**Figure S4** – Typical cyclic voltammograms of the modified carbon paste electrode with xerogel:Eu<sup>3+</sup>(1 ch%) obtained in 0.1 mol L<sup>-1</sup> KCl solution at a different potential scan rates (5–300 mV s<sup>-1</sup>). Insert: dependence of anodic and cathodic peak current of the modified electrode as function of the square root of the scan rate.

Figure S5

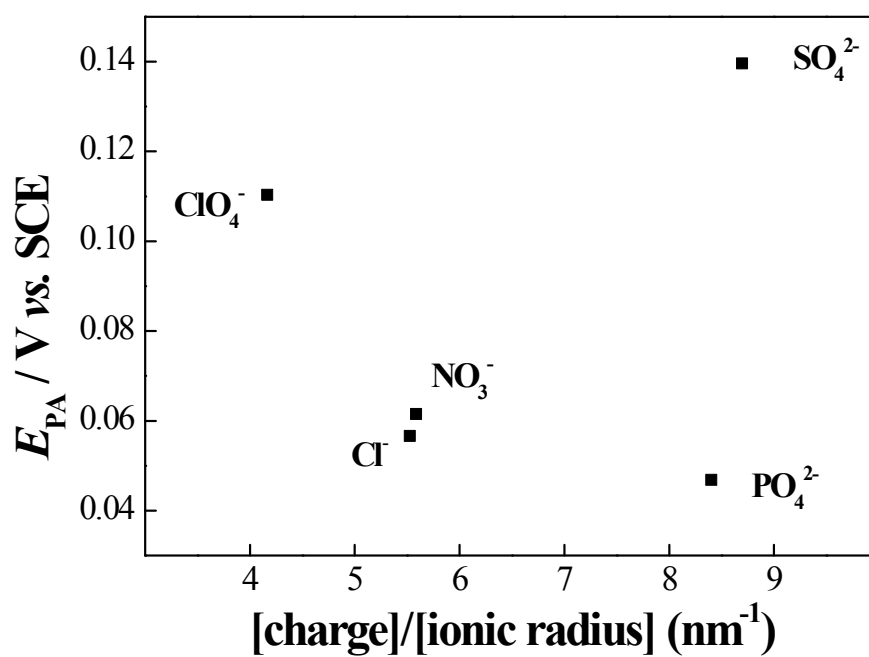

Figure S5 – Dependence of the anodic peak potential of the modified carbon paste electrode with xerogel:Eu<sup>3+</sup>(1 ch%) vs. ratio  $[\text{charge}]/[\text{ionic radius}]$ .

Figure S6

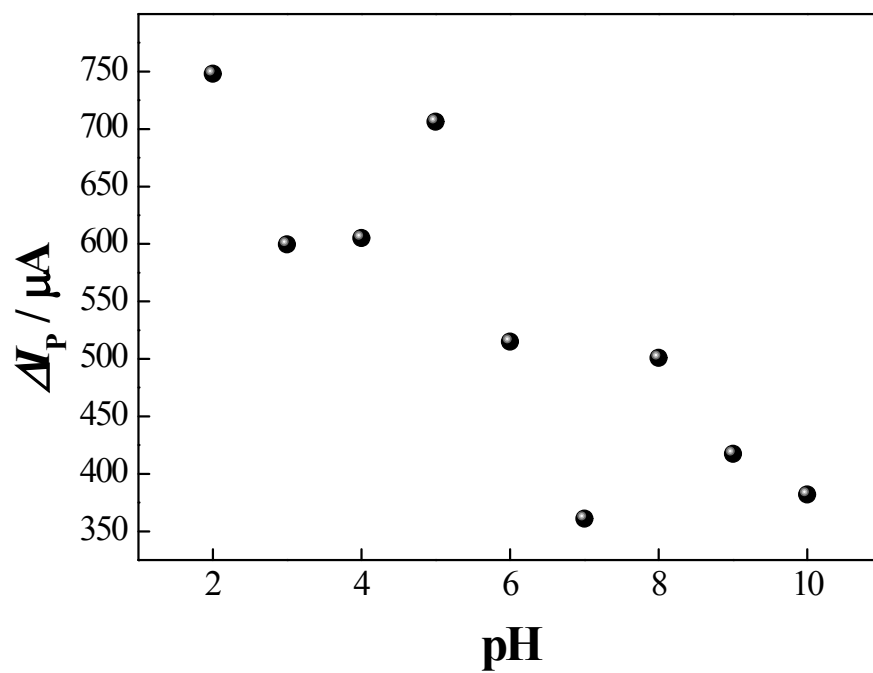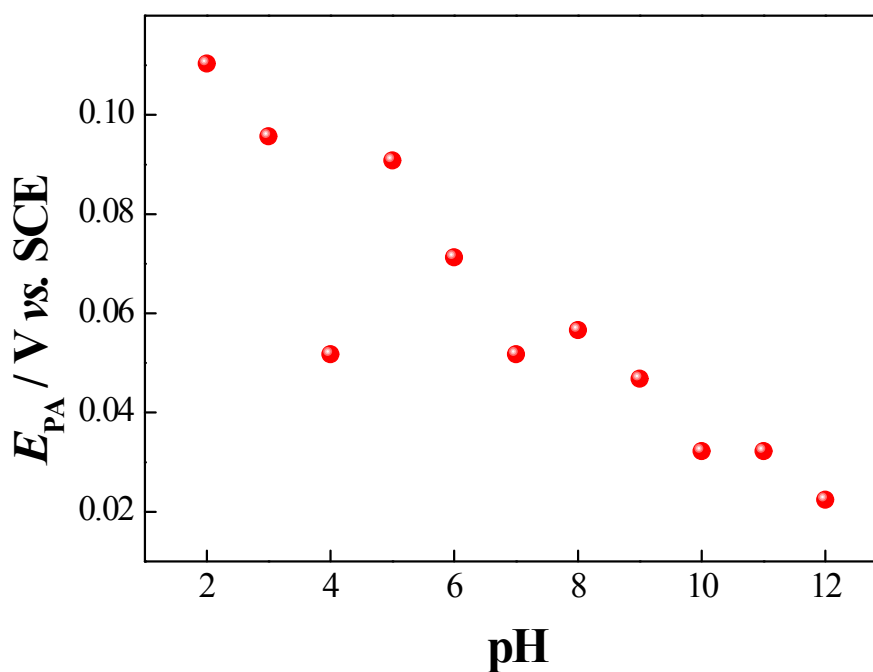

Figure S6 – Effect of pH on the voltammetric response (current and peak potential values) of the modified carbon paste electrode with xerogel:Eu<sup>3+</sup>(1 ch%) .
